# Supplementary material for: The use of ionic liquid as a mobile phase modifier in analytical supercritical fluid chromatography for the separation of flavonoids
Source: Royal Society of Chemistry journal article supplement (doi:10.1039/c6ra10975f), 2016-01-01
Supplement: c6ra10975f1.pdf [file c6ra10975f1.pdf]

*Supplementary Materials for*

The use of ionic liquid as mobile phase modifier in analytical supercritical  
fluid chromatography for the separation of flavonoids

Wen Gao, Xin Dong, Rui Wang, Xin-Guang Liu, Ping Li\*, Hua Yang\*

*State Key Laboratory of Natural Medicines, China Pharmaceutical University, No. 24 Tongjia*

*Lane, Nanjing 210009, China*

\*Corresponding author

*E-mail addresses:* [104yang104@163.com](mailto:104yang104@163.com); [liping2004@126.com](mailto:liping2004@126.com); Tel. & fax: +86 25 8327 1379

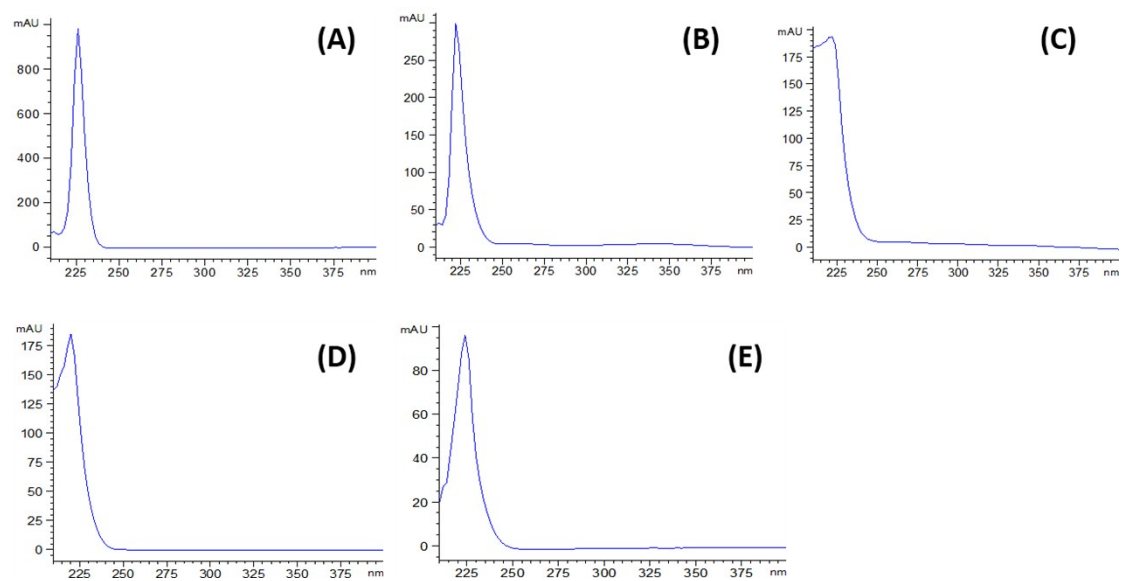

Fig. S1 The UV spectrums of **(A)** [Bmim][BF<sub>4</sub>]; **(B)** [Bmim][NTF<sub>2</sub>];  
**(C)** [Bmim][PF<sub>6</sub>]; **(D)** [Bmim][OTf]; **(E)** [Bmim][NO<sub>3</sub>].

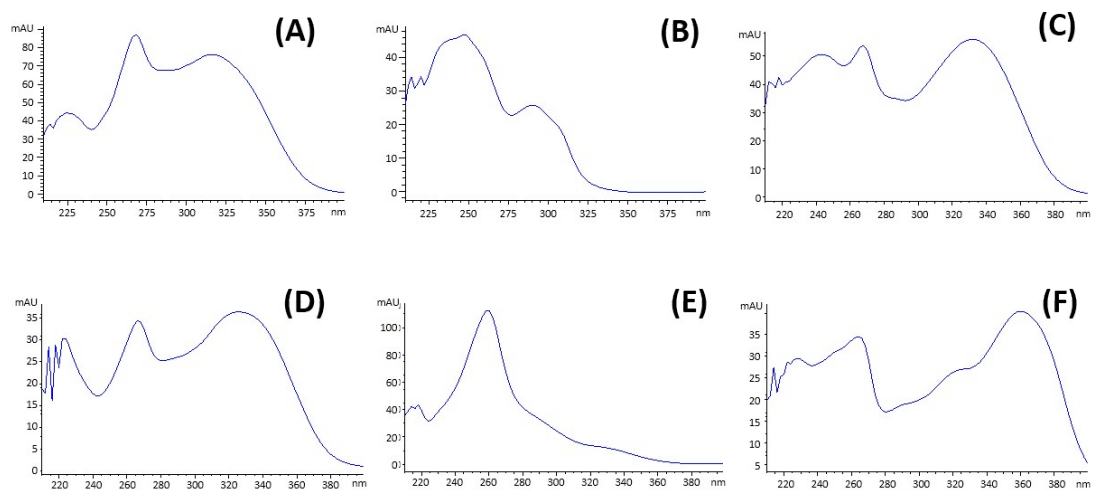

Fig. S2 The UV spectrums of **(A)** acacetin; **(B)** calycosin; **(C)** diosmetin;  
**(D)** apigenin; **(E)** genistein; **(F)** luteolin.

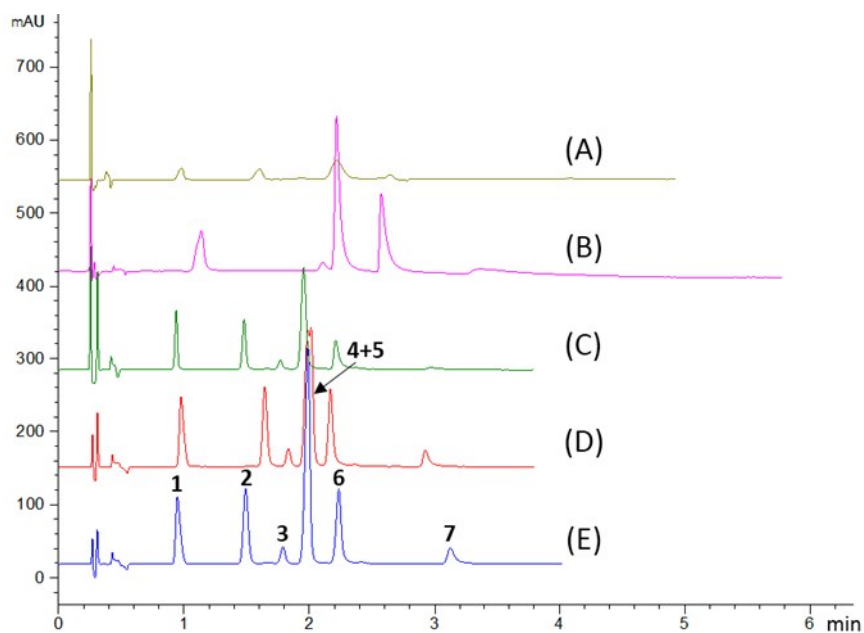

Fig. S3 SFC Chromatograms of the seven flavones obtained using various ILs-additives. **(A)** 8/8/15 min 10 mM/L [bmim][NO<sub>3</sub>] in MeOH (%) at 0/1/5 min, **(B)** 8/8/40 min 10 mM/L [bmim][PF<sub>6</sub>] in MeOH (%) at 0/1/7 min, **(C)** 8/8/13.5 min 10 mM/L [bmim][OTF] in MeOH (%) at 0/1/4 min, **(D)** 8/8/13.5 min 10 mM/L [bmim][NTF<sub>2</sub>] in MeOH (%) at 0/1/4 min, **(E)** 8/8/13.5 min 10 mM/L [bmim][BF<sub>4</sub>] in MeOH (%) at 0/1/4 min.
